# Supplementary material for: Role of Histamine and Related Signaling in Kaposi’s Sarcoma-Associated Herpesvirus Pathogenesis and Oncogenesis
Source: MDPI journal article supplement (doi:10.3390/v15041011), 2023-04-20
Supplement: s1 [file s1]

**Supplemental Table S1. Primer sequences for RT-qPCR.**

| <b>Gene</b>    | <b>Sequences (5' → 3')</b>                                                       |
|----------------|----------------------------------------------------------------------------------|
| <i>IL6</i>     | <i>sense</i> GTCCAGTTGCCTTCTCCC<br><i>antisense</i> GCCTCTTTGCTGCTTTCA           |
| <i>IL8</i>     | <i>sense</i> TGGCAGCCTTCCTGATT<br><i>antisense</i> AACCTCTGCACCCAGTT             |
| <i>CXCL1</i>   | <i>sense</i> CACTGCTGCTCCTGCTCCT<br><i>antisense</i> GGCTATGACTTCGGTTTGG         |
| <i>IFN-β</i>   | <i>sense</i> CAAGTGTCTCCTCCAAAT<br><i>antisense</i> CCTCAGGGATGTCAAAGT           |
| <i>IFIT1</i>   | <i>sense</i> CACCCACTTCTGTCTTACT<br><i>antisense</i> ACATTCTTGCCAGGTCTA          |
| <i>IFI44</i>   | <i>sense</i> CCTGCCGTTTATTCTGTG<br><i>antisense</i> CGTTACCAACTCCCTTC            |
| <i>LANA</i>    | <i>sense</i> TCCCTCTACACTAAACCCAATA<br><i>antisense</i> TTGCTAATCTCGTTGTCCC      |
| <i>RTA</i>     | <i>sense</i> CACAAAAATGGCGCAAGATGA<br><i>antisense</i> TGGTAGAGTTGGGCCTTCAGTT    |
| <i>ORF17</i>   | <i>sense</i> AGATTTTTCACGGGGGCTCTGG<br><i>antisense</i> TGGGCTGGACACTGGGTCTATTTC |
| <i>β-actin</i> | <i>sense</i> GGAAATCGTGCGTGACATT<br><i>antisense</i> GACTCGTCATACTCCTGCTTG       |
